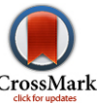

# Incidence and Geographical Variation of Amyotrophic Lateral Sclerosis (ALS) in Southern Germany – Completeness of the ALS Registry Swabia

Hatice Uenal<sup>1</sup>, Angela Rosenbohm<sup>2</sup>, Johannes Kufeldt<sup>1</sup>, Patrick Weydt<sup>2</sup>, Katharina Goder<sup>2</sup>, Albert Ludolph<sup>2</sup>, Dietrich Rothenbacher<sup>1</sup>, Gabriele Nagel<sup>1\*</sup> and the ALS registry Study Group<sup>¶</sup>

<sup>1</sup> Institute for Epidemiology and Medical Biometry, Ulm University, Ulm, Germany, <sup>2</sup> Department of Neurology, Ulm University Clinic, Ulm, Germany

## Abstract

Objective of this paper was to investigate the incidence, potential geographical clusters and the completeness of the amyotrophic lateral sclerosis (ALS) registry in Southern Germany (Swabia). Age-standardized incidence rates (ASR) and ratios (SIR) as well as 95% confidence intervals (CI) were estimated at county level. Capture-recapture (CARE) procedures were applied taking data source dependency into account to estimate the quality of case ascertainment in the ALS registry Swabia. We identified 438 ALS cases (53% men, 47% women) in the target population of about 8.4 Mio inhabitants. The gender ratio (men:women) was 1.1:1. The mean age at onset of ALS was 63.8 (SD = 11.9) years for men and 66.0 (12.2) for women. The age distribution peaked in the age group 70–74 years. The ASR of ALS was 2.5 per 100,000 person years (PY; 95% CI: 2.3–2.7). The mean SIR was 1.1 per 100,000 PY (95% CI: 1.0–1.2). High SIR suggesting geographical clusters were observed in two counties (Göppingen and Bodenseekreis), but the variation was not statistically significant ( $p$ -values = 0.2 and 0.5). The percentage of CARE estimated missing cases was 18.9% in the registry yielding an ASR of 3.1 per 100,000 PY. The high coverage of the CARE estimated completeness of the ALS registry Swabia indicates excellent quality for future projects. Regional variations have to be investigated further.

**Citation:** Uenal H, Rosenbohm A, Kufeldt J, Weydt P, Goder K, et al. (2014) Incidence and Geographical Variation of Amyotrophic Lateral Sclerosis (ALS) in Southern Germany – Completeness of the ALS Registry Swabia. *PLoS ONE* 9(4): e93932. doi:10.1371/journal.pone.0093932

**Editor:** Cedric Raoul, Inserm, France

**Received:** December 19, 2013; **Accepted:** March 11, 2014; **Published:** April 10, 2014

**Copyright:** © 2014 Uenal et al. This is an open-access article distributed under the terms of the Creative Commons Attribution License, which permits unrestricted use, distribution, and reproduction in any medium, provided the original author and source are credited.

**Funding:** This work was supported by the Deutsche Forschungsgemeinschaft (main number 577 631, project LU 336/15-1). The funders had no role in study design, data collection and analysis, decision to publish, or preparation of the manuscript.

**Competing Interests:** The authors have declared that no competing interests exist.

\* E-mail: gabriele.nagel@uni-ulm.de

¶ Members of the ALS registry Study Group can be found in the acknowledgments.

## Introduction

### Background

In Germany, ALS data on population-based incidence is lacking. The incidence of ALS is estimated to be 2–3 cases per 100,000 person years (PY) in European countries [1–3]. During the past years, a rise of the incidence of ALS has been discussed in countries such as France, Sweden and Finland [4–6]. The age distribution is reported to peak in the age group 70–74 years [3,7,8]. The ratio males/females can be as high as 2.6:1 [2] but recent studies report a more balanced gender ratio [9,10].

Very little is known about etiological risk factors of ALS. About 10% of all ALS cases show a clearly Mendelian inheritance pattern. The remainder is isolated in nature and termed sporadic. Previous studies from Europe and the Americas investigating possible environmental influences, reported significant geographical clusters [11–15]. The identification of such variation may be an important starting point to pinpoint potential environmental and other risk factors. An important prerequisite for the analysis of registry data is the knowledge of the completeness of the ALS cases in the target population.

ALS registries have been implemented in different regions and case ascertainment is typically estimated through information from multiple sources. However, especially in rare diseases, complete-

ness of case ascertainment is crucial to obtain valid estimates and poses a special challenge. A recent US-based study, estimated missing almost 10% of ALS cases [16]. In European countries, capture-recapture (CARE) identified 19.6% missing cases in a 4 years period were estimated in the Netherlands. [7] and 34.7% CARE missing cases in the Limousin region of France [17].

### Objectives

The main objectives of this paper are firstly, to explore the incidence of ALS and investigate potential geographical variation and secondly, to estimate the completeness of the ALS registry in the region of Swabia (Southern Germany), by means of capture-recapture methods.

## Materials and Methods

### ALS registry Swabia

**Ethics Statement.** International, national and state rules were followed implementing the ALS registry Swabia. We obtained full ethical approval of the ethical committees of Ulm University and the regional medical associations (Landesärztekammer Baden-Württemberg and Landesärztekammer Bayern).

Regional cooperation partners identified ALS patients and obtained written informed consent, before notifying the coordination

center at Ulm University. From patients who deceased before the home visit for data collection took place, a minimal data set (3 variables: zip code, age (not date of birth) and gender) was registered anonymously and included in the analysis after duplication of record had been excluded.

**Study design and study population.** The ALS registry Swabia is a clinical-epidemiological registry with the aim to collect data on all newly diagnosed ALS cases in the target population, to estimate epidemiological parameters such as incidence and to describe patient- and disease characteristics, such as natural history of ALS. We have described the registry in more detail elsewhere [18,19]. The study population consists of all inhabitants living in the region of Swabia (approximately 8.4 million in 2008 and 2009). The exact study region is defined by city and county borders and largely reflects the geographical region of Swabia.

**Registry cases (inclusion and exclusion criteria).** The inclusion and exclusion criteria for the ALS registry are defined by the diagnosis of possible, probable or definite ALS according to the revised El Escorial criteria for international comparison with epidemiological ALS registries [19–22]. Date of diagnosis and residence at the time of diagnosis were recorded. Cases comprise the International Classification of Diseases (ICD) -10 code G.12.2. Regional cooperation partners identified potential patients and obtained informed consent before they notified the ALS registry at Ulm University. In order to achieve maximal standardization, all cases are reviewed by an experienced neurologist according to standardized criteria

**Study design.** The ALS registry is an observational, population based cohort study with a retrospective (all newly diagnosed ALS cases between October 01, 2008 – September 30, 2010) and prospective (newly diagnosed ALS cases as from October 01, 2010) arm. Due to the well-distributed network of neurological centers in the region of Swabia, the ALS patients in Southern Germany are comprehensively recorded.

In the present study, we included only retrospective ALS data registered until end of December 2012. The retrospective branch provided first estimates of the incidence and geographical variation of ALS cases. This enabled us to explore the completeness of the registry by means of capture-recapture case ascertainment. Due to the retrospective data collection, a diagnosis of ALS was most likely.

**Data collection and quality assurance.** Details can be found in previous publications [18,23]. In brief, all new suspected ALS cases are reported to the data collection office of the ALS registry Swabia at the Department of Neurology of Ulm University. The reports are checked for eligibility for inclusion and thereafter the encryption of personal data is performed. The data coordinating and analysis center is located at the Institute of Epidemiology and Medical Biometry of Ulm University. Here only pseudonymized data of the cases are stored and internal quality checks and analyses are performed on a routine basis.

**Epidemiological measures and county levels.** We calculated the age-standardized rates (ASR) for the target population per 100,000 PY based on the exact European population of the year 2010 with a 95% confidence interval (CI). We applied the direct method in 5-year age-categories [24] over all counties combined as well as for each county in Southern Germany. To determine possible geographical clusters, we displayed small-scale estimated epidemiological measures at county-level. To compare the influence of the different population weights and achieve comparability with other published data, the ASRs were additionally calculated with the European standard population of the year 1990 and an old European standard population of the year 1976 [25]. To visualize counties in which significantly more

ALS cases were observed than expected, we also determined age-standardized incidence ratios (SIR) at county-level. Expected ALS cases in each county were estimated using 5-years age class rates of combined European data from 6 ALS registries [3]. Analysis for this paper was performed using SAS software [26]. Increased rates of counties were investigated with Spatial Scan Statistics in SatScan [27].

**Completeness of the registry - capture-recapture estimation methods.** For the statistical CARE procedures, we included five ALS data sources with all natural registered ALS cases in the respective ALS data source, which were according to the health care characteristics of the notifying partners:

(1) ALS registry Swabia, (2) clinical centers, (3) university clinics, (4) small clinics and hospitals, (5) private neurological practice doctors and medical care centers.

The information of ALS cases in the respective data source intersections (multiple records) is the main precondition in CARE methods. The simplest method is the origin variant of Petersen dual system estimator  $N$ , a simple equation of  $n_1 \cap n_2 / n_2 = n_1 / N$  [28]. It is commonly used in the wildness to track animal populations with only 2 sources, where animals were captured and marked in a population ( $n_1$ ) and recaptured again ( $n_2$ ).

We compared several statistical CARE procedures: simple Petersen estimates with simple techniques of the set theory [28], Chapman estimates [29], nearly unbiased maximum likelihood estimator modified firstly by Schnabel [29–31], Schnabel/Chapman estimates for Poisson distributions for the sparse data in rare diseases [32], and log linear model approaches to control for bias [33]. With regard to the latter, possible dependence between data sources is taken under consideration with log linear approaches to adjust among multiple sources. This method requires that data source characteristics (including intersections) of each patient are separately modeled for the main log linear model.

According to the requirements of the linear model, we categorized our ALS cases by their natural occurrence in the data source intersections and applied the interactive freeware program CARE [34] in combination with Gsrn 5.0 according to the suggestions of Chao et al. [33] to ascertain possible missing cases in the ALS registry Swabia.

## Results

### ALS registry Swabia (retrospective ALS cases)

In total, 520 suspected ALS cases were reported, of whom 8 cases could not be confirmed, and 74 ALS cases were multiple recorded. Thus, 438 confirmed ALS cases remained, of whom 53% were men and 47% women. The gender ratio (men:women) was 1.1. The age distribution of all ALS cases peaked in the age group 70–74 years. Men peaked in the age group 65–69 and women in 70–74 age group. Male patients had a mean age at diagnosis (SD) of 63.8 (11.9) years and female patients a mean age at diagnosis of 66.0 (12.2) years.

### Epidemiological measures and results on county levels

Overall, the crude incidence was estimated to be 2.6 per 100,000 PY. The age-standardized exact European population (data from year 2010) incidence rate was 2.5 per 100,000 PY (95% CI: 2.3–2.7). The 95% CI based on the Poisson distribution did not differ.

Depending on the selection of the European population to standardize to, the ASRs for retrospective data varied from 1.9 to 2.5 per 100,000 PY for the whole study region and differed in their geographical representation of the 40 counties. A comparison of ASRs at county level is given in **Fig. 1**.

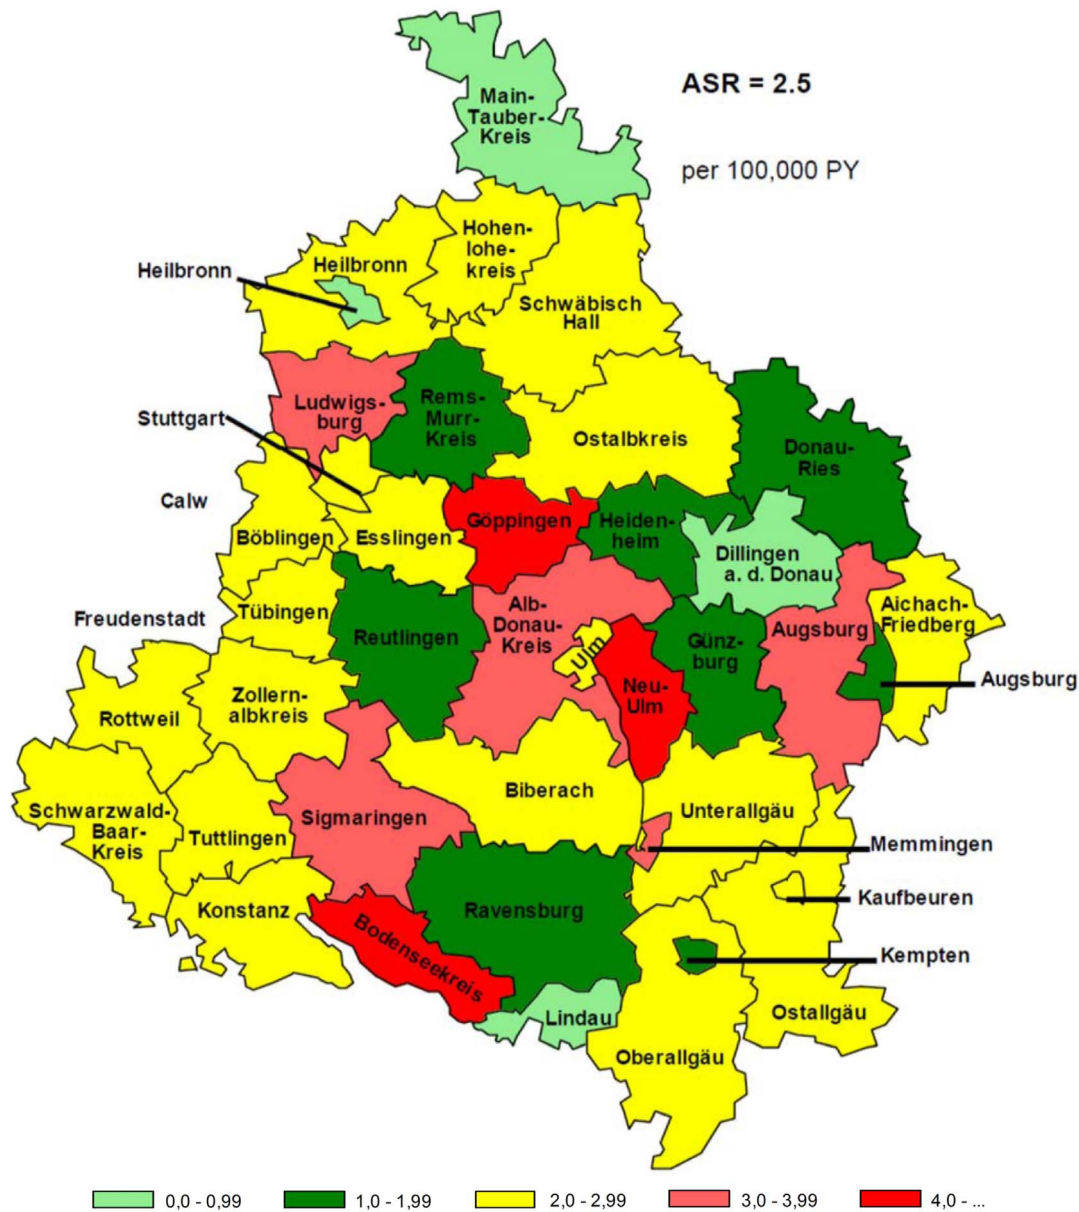

**Figure 1. Comparison of age standardized incidence rates of ALS registry data at county level with the exact European populations.**

doi:10.1371/journal.pone.0093932.g001

As displayed in **Fig. 1**, using the exact EU population, the highest ASR was observed in the county Bodenseekreis with 4.4 per 100,000 PY and the lowest with 0.6 per 100,000 PY in the county Lindau. With other EU standard populations, other high incidence counties disappeared (e.g. Göppingen with the old standard population of 1976).

Spatial Scan statistics and hypothesis testing were therefore considered to test for geographical differences.

Comparing the 40 counties in the target population, high-ratio counties (Göppingen: SIR = 1.9, CI = 1.2–2.8; ‘Bodensee’: SIR = 1.8, CI = 1.1–2.8; **Fig. 2** (dark-red colored)) were determined, but the difference in variation in the overall pattern was not statistically significant ( $p$ -value = 0.17 and  $p$ -value = 0.43, respectively).

### Completeness of the registry - capture-recapture estimation methods

Due to multiple information of ALS recording, the case ascertainment of the ALS registry Swabia was estimated by 5 data sources:

(1) ALS registry Swabia ( $N = 438$ ); (2) University clinics ( $N = 256$ ); (3) clinical centers ( $N = 122$ ); (4) small clinics and hospitals ( $N = 130$ ) and (5) private neurological practice doctors and medical care centers ( $N = 4$ ) (**Fig. 3**).

The data source intersections of registered ALS cases to be present or absent are shown in **Fig. 3**.

The percentage of log-linear estimated missing ALS cases in the target population was estimated to be 18.9%. Correspondingly, a maximum total of 540 (SD = 13.1) ALS cases is estimated where source dependency is taken into account and estimation bias were

minimized in optimizing logistical approaches. Compared to other statistical CARE procedures, the log-linear model included all available intersections of the data sources and took the dependency between the data sources into account. Alternative methods, which are considered less accurate, yielded results from 15.8% to 35.7% depending on the chosen estimation method and the data sources included (**table 1**).

In our study, the alternative CARE methods turned out to be conservative in source dependency in relation to sparse data and the corresponding results seemed strongly biased depending on the selection of intersections terms. Information of included interaction terms are set out in **table 1**. A comparison of the total estimated ALS cases in the target population ( $\hat{N} = 520-681$ ) is summarized in **table 1** by the missing percentages regarding the observed total ALS cases ( $N = 438$ ).

Adding the estimated 18.9% CARE missing cases to the observed ALS cases, the ASR increased to 3.1 per 100,000 PY as expected for case ascertainment in the ALS registry before study beginning.

Based on log-linear CARE estimated total ALS cases in the study region, the number of ALS cases, demographic characteristics and the completeness in percentage in the respective data sources are given in the following **table 2**.

## Discussion

### Summary of the main results

Based on the first population based ALS registry in Germany covering a geographically defined region with about 8.4 million inhabitants, a crude incidence rate of ALS of 2.6 per 100,000 PY was estimated. The exact European ASR was 2.5 per 100,000 PY

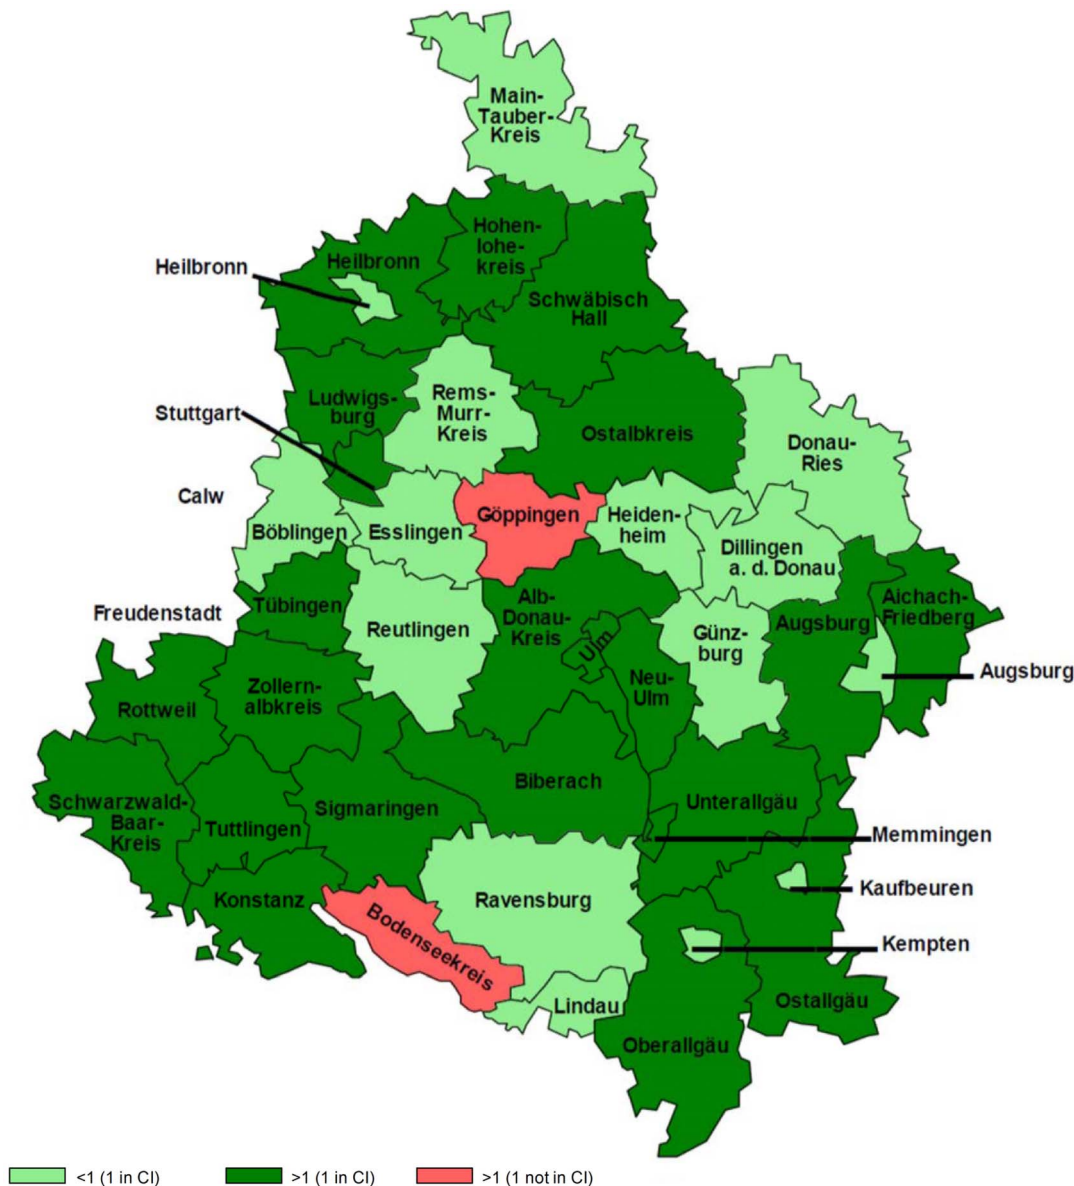

**Figure 2. Age standardized incidence ratios of ALS registry data at county level. Abbreviation and explanation:** significant counties (light green: 'Confidence Interval' CI below the cut-off value of 1 means less observed cases as expected; dark red: CI above the cut-off value means more observed cases as expected), not significant counties are displayed in dark-green and light red. doi:10.1371/journal.pone.0093932.g002



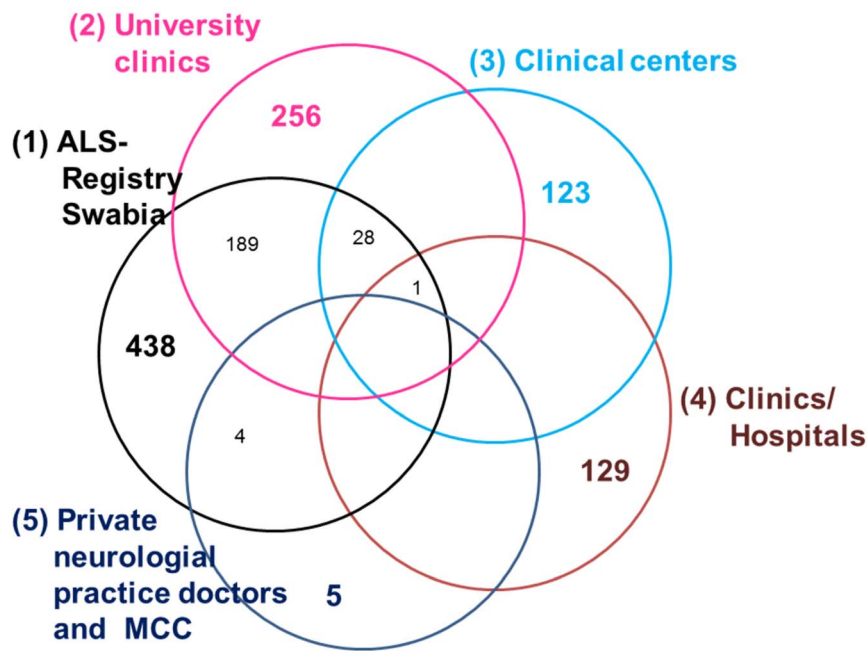

**Figure 3. Data source intersections of the ALS cases in Southern Germany. Abbreviation: MCC Medical Care Centers. Other Intersections: (1),(3),(4) = 2; (1),(3) = 91; (1),(4) = 95; (1),(2),(4) = 31; doi:10.1371/journal.pone.0093932.g003**

(95%-CI: 2.3 to 2.7). The male/female ratio was 1.1 and the age-distribution of the ALS cases peaked in the age group 70–74 years. The observed incidence rates and the peak were consistent with findings from other European countries, indicating that the ALS registry Swabia is well implemented. Although we found some geographical incidence variation, the differences were not statistically significant and most likely represent chance variation. The estimated completeness was 81.1% and indicates a good coverage of the registry. After correction for potentially missing cases, the ASR was estimated to a maximum of 3.1 per 100,000 PY.

### Epidemiological measures of ALS

In our study, the crude annual incidence rate for 2009/2010 was comparable to the estimated average crude incidence rate of ALS in Europe. The ASR in Swabia was in line with the different ASRs ranging in European countries from a low of 1.5 in Lancashire and a high of 2.7 in Ireland per 100,000 PY [3,35]. A peak incidence in the age group 70–74 years is also reported by other authors [3,7,8]. A decreasing trend in the gender ratio towards one as described in recent studies [9,10] was clearly evident from our data. Our study results were also in line with ALS-incidence rates in Canada, which range from 1.6 to 2.4 for crude incidences and 2.1 to 2.3 for ASRs [36]. Higher ASRs were observed in previous studies (USA standard population) for the age group of 45 to 74 years in studies from Canada, Denmark, Finland, Italy, Ireland, Israel, Sardinia, Scotland, Sweden, USA, with a ASR range of 2.1 (Israel) to 8.5 (Middle Finland) [8].

These differences can be explained e.g. by to possible geographical variation, the underlying population size, the completeness of the registries or bias produced by weights of the standard population. Wide 95% CIs of ASRs could also partly explain the variation in the ASRs, possibly revealing different methods used in the registries to estimate epidemiological parameters. Analyzing ALS data, the geographical variation of incidences might be a result of the standard deviation or standard

error occurring from the issue of sparse data. In 1996, Pringle mentioned that a compromise could be summarizing two extremes, small scaled cartographical presentation of the estimated risks (focus attention on smaller areas) and probability maps (focus attention on larger areas). Empirical Bayesian approaches offer such a possible solution by providing estimates of relative risks e.g. for each county and converting them into rates by simply multiplying them by the overall rate [37]. Future studies that compare Bayesian corrected epidemiological measures at county level with the measures estimated in this work, should be considered since enhanced ALS data are provided and maybe added for underreported counties. To reduce bias, additional estimates for the new, old and exact European standard population were calculated in our study with an ASR of 2.0, 1.9 and 2.5 respectively. Based on the SIRs ascertained with the suggested European rates in [3], more ALS cases were expected in some counties suggesting underreporting in these counties (light green colored; **Fig. 2**). Possible explanations for rates lower than expected might be that patients corresponding to the region visited clinics in neighboring counties. However, all clinics in the study region as well as clinics in neighboring counties outside the study region were contacted at regular intervals (3 to 6 months) to reduce delayed notifications and to improve the data acquisition. Counties with high SIR are suggestive for disease clusters and could be related to familial cases. However, the familial cases were not observed in the two counties with high SIR in our study. Thus, possible other risk factors or as yet unidentified familial cases should be explored in future studies.

The completeness of the registry might also be influenced by unknown or delayed diagnosis. Generally, previous studies reported a median of about 9–13 months diagnostic delay from symptom onset and a possible underreporting in some geographic areas [3,38–40].

**Table 1.** Case ascertainment of the ALS cases in Southern Germany compared by different statistical procedures of capture-recapture methods.

| CARE – Estimation Method           | Case ascertainment:                        |              |                                                                                          |
|------------------------------------|--------------------------------------------|--------------|------------------------------------------------------------------------------------------|
|                                    | Estimated ALS cases in ALS registry Swabia |              |                                                                                          |
| Observed ALS cases:                | Missing                                    | CARE         | Included interaction terms                                                               |
| $\hat{N} = 438$                    | (%)                                        | $\hat{N}$    | (data sources)                                                                           |
| <b>Log Linear Model</b>            | <b>18.9</b>                                | <b>539.9</b> | SD = 13.1                                                                                |
|                                    |                                            |              | (1)*(2); (1)*(3); (1)*(4); (1)*(5); (2)*(3); (2)*(4); (2)*(5); (3)*(4); (3)*(5); (4)*(5) |
| <i>Alternative approaches:</i>     |                                            |              |                                                                                          |
| <b>Peterson Estimates</b>          | 21.1                                       | 555          | (1)*(2); (1)*(3); (1)*(4); (1)*(5)                                                       |
| <b>Schnabel/Chapman Estimates</b>  | 25.3                                       | 586          | (1)*(2); (1)*(3); (1)*(4); (1)*(5); (2)*(5); (3)*(5); (4)*(5)                            |
|                                    | 25.6                                       | 589          | (1)*(2); (1)*(3); (1)*(4)                                                                |
| <b>Chapman Estimates</b>           | 26.0                                       | 592          | (1)*(2); (1)*(3); (1)*(4); (1)*(5); (2)*(5); (3)*(5); (4)*(5)                            |
|                                    | 15.8                                       | 520          | (1)*(2); (1)*(3); (1)*(4); (1)*(5); (3)*(5); (4)*(5)                                     |
| <b>Schnabel modified Estimates</b> | 35.7                                       | 681          | (1)*(2); (1)*(3); (1)*(4); (1)*(5); (2)*(5); (3)*(5); (4)*(5)                            |
|                                    | 24.5                                       | 580          | (1)*(2); (1)*(3); (1)*(4); (1)*(5); (3)*(5); (4)*(5)                                     |

**Abbreviations:**  $\hat{N}$  estimated total number; SD Standard Deviation; CARE capture-recapture Methods.  
doi:10.1371/journal.pone.0093932.t001

**Comparison with the literature on completeness of ALS registries - capture-recapture estimation methods**

The estimated percentage of CARE missing ALS cases in our study (range of 15.8% to 35.7%) has to be compared with other ALS registries from a low of 2.2% in Scotland [41] or Uruguay of 3.5% [14] and a high of 31.2% in Texas (Harris County) [28] or in France (Limousin) of 34.7% [17]. Consistent with our findings, a study from the Netherlands [7] reported with 19.6% CARE missing ALS cases and a CARE estimated incidence rate of 2.8 in a study population of 16.5 Mio inhabitants. However, differences could be explained by the different regions with different conditions or due to different methods used. Differences in the number of data sources included, the interaction terms the study period chosen or the data source dependency considered in a model, were all discussed as potential sources of bias [7,16,17,28,42].

In terms of the estimation of the registry completeness, several statistical procedures with CARE methods were compared to consider the sparse data in each data source and to reduce estimation bias caused by methodological approaches (**Methods S1**). Although the models (especially Poisson distribution related)

seem to be robust concerning sparse data, results show large variation as soon as more data sources are excluded from the model. A robust model for example was presented by Schnabel in Chapman et al. [32], with the advantage of each intersection of the data sources being approximately Poisson distributed [32]. However, main limitations with CARE methods are the limited accuracy of estimate due to uncertainties in source dependencies. The application of these methods was complex to evaluate the completeness of the registry. The case ascertainment was evaluated partly in some of these methods strongly biased regarding the intersection terms in our study as well as CARE estimates with only 2 data sources due to the source dependencies. Similar observations were made in the ALS study of Wittie et al. [16,17,28]. We therefore compared log-linear approaches to take the source dependency into account, where each ALS cases had to be modeled as ‘present’ or ‘absent’ in a data source and provided in a separate dataset for the log linear model calculations as suggested by Chao et al. [33]. This method seemed to be the most adequate method in estimating the case ascertainment of rare diseases, because the dependency between multiple data sources of

**Table 2.** Demographic characteristics of the observed ALS cases in the data sources.

|                            | CARE         | ALS      | University | Clinical | Clinics/ | NPD     |
|----------------------------|--------------|----------|------------|----------|----------|---------|
|                            | $\hat{N}$    | Registry | Clinics    | Centers  | Hospital | and MCC |
| Number of cases            | <b>539.9</b> | 438      | 256        | 122      | 130      | 4       |
| Estimated completeness (%) |              | 81%      | 47%        | 23%      | 24%      | 1%      |
| Age (years): Mean          |              | 64.2     | 61.5       | 64.6     | 67.6     | 66.3    |
| (SD)                       |              | (12.1)   | (11.3)     | (12.4)   | (11.1)   | (19.4)  |
| Gender ratio (men:women)   |              | 1.1      | 1.4        | 0.8      | 0.8      | 1       |

**Abbreviations:**  $\hat{N}$  estimated total number; CARE capture-recapture methods; NPD and MCC: private neurological practice doctors and medical care centers.  
doi:10.1371/journal.pone.0093932.t002

sparse data are included as separate log functions into the main model [33].

### Strength and limitations

In general, our results were comparable to data on epidemiological characteristics collected in the EURALS project [43,44], which facilitated the data quality evaluation. Data quality assurance and plausibility-check procedures have been implemented ensuring high standards of our data collection and management procedures. Newly diagnosed ALS cases were reviewed by experienced neurologists according to the revised EL Escorial criteria [20–22] to assure high international standards.

To maintain a high completeness of the registry, constant professional training of study staff and collaborators and the availability of study nurses to recover all ALS cases all over the study region as was provided. Due to the diagnosis delay, data on retrospective patients were still recorded long after the end of the recruitment period in the retrospective arm of the study. Another limitation was the lack of access to an independent mortality data source on an individual level, due to German administrative regulations.

### Outlook

The high coverage of the CARE estimated completeness of the successfully implemented ALS registry Swabia indicates excellent quality for future projects. Interesting research aspects will cover a cluster analysis at zip code level by means of spatial scan statistics including potential, environmental risk factors in ALS cases at zip code level.

Following cooperating partners provided data for the ALS registry Swabia:

### Supporting Information

**Methods S1** (PDF)

### Acknowledgments

The ALS registry Study Group

Adam T., Praxis EMSA Singen  
 Arnold G., Klinikum Sindelfingen-Böblingen, Department of Neurology  
 Baier H., ZFP Südwürttemberg, Department of Epileptology  
 Bäßner H., Bürgerhospital Stuttgart, Department of Neurology  
 Beattie J., Ostalb-Klinikum Aalen, Department of Neurology  
 Behne F., ZFP Südwürttemberg, Department of Epileptology  
 Bengel D., Oberschwabenklinik Ravensburg, Department of Neurology  
 Bluthardt M., Department of Neurology, Ludwigsburg  
 Börtlein A., Bürgerhospital Stuttgart, Department of Neurology  
 Dettmers C., Schmieder Kliniken Konstanz  
 Eppinger B., Klinikum am Gesundbrunnen Heilbronn, Department of Neurology  
 Gold H.-J., Klinikum am Gesundbrunnen Heilbronn, Department of Neurology  
 Hecht M., Bezirkskrankenhaus Kaufbeuren, Department of Neurology  
 Heimbach B., University of Freiburg, Department of Neurology  
 Hendrich C., Klinikum Friedrichshafen, Department of Neurology  
 Herting B., Diakonie-Klinikum Schwäbisch Hall, Department of Neurology  
 Huber R., Klinikum Friedrichshafen, Department of Neurology  
 Hülsler P.-J., Fachklinik Wangen, Department of Neurology  
 Kaendler S., Kliniken Landkreis Heidenheim, Department of Neurology

### References

- Kiernan MC, Vucic S, Cheah BC, Turner MR, Eisen A, et al. (2011) Amyotrophic lateral sclerosis. *Lancet* 377: 942–955. doi:10.1016/S0140-6736(10)61156-7.
- Al-Chalabi A, Hardiman O (2013) The epidemiology of ALS: a conspiracy of genes, environment and time. *Nat Rev Neurol* 9: 617–628. doi:10.1038/nrneurol.2013.203.
- Kaspar A., Oberschwabenklinik Ravensburg, Department of Neurology
- Kimmig H., Kliniken Schwenningen, Department of Neurology
- Klötzsch C., Schmieder Kliniken Allensbach, Bodensee Klinikum Hegau Konstanz
- Kühne J., Schmieder Kliniken Allensbach, Bodensee Klinikum Hegau Konstanz
- Lewis D., Marienhospital Stuttgart, Department of Neurology
- Lichy C., Klinikum Memmingen, Department of Neurology
- Lindner A., Marienhospital Stuttgart, Department of Neurology
- Lorenzl S., LMU München, Department of Neurology
- Lutz-Schuhbauer S., Department of Neurology, Dietenbronn
- Mäurer M., Caritas Krankenhaus, Bad Mergentheim, Department of Neurology
- Meinck H. M., University of Heidelberg, Department of Neurology
- Meudt O., Klinikum Memmingen, Department of Neurology
- Müller vom Hagen J., Universitätsklinikum Tübingen, Department of Neurology
- Nägele A., Christophsbad Göppingen, Department of Neurology
- Naumann M., Klinikum Augsburg, Department of Neurology und Neurophysiologie
- Neher K.-D., Vinzenz von Paul Hospital, Rottweil, Department of Neurology
- Neuhaus O., Kliniken Landkreis Sigmaringen, Department of Neurology
- Neusch C., Praxis EMSA Singen
- Niehaus L., Department of Neurology, Winnenden
- Patzner M., Fachklinik Wangen, Department of Neurology
- Peters J., Ostalb-Klinikum Aalen, Department of Neurology
- Poerschke Y., Bundeswehrkrankenhaus Ulm, Department of Neurology
- Raape J., ZFP Südwürttemberg, Neurologie Weissenau
- Ratzka P., Klinikum Augsburg, Department of Neurology und Neurophysiologie
- Reeh A., Kliniken Landkreis Heidenheim, Department of Neurology
- Rettenmayr C., Klinikum Esslingen, Department of Neurology
- Rothmeier J., ZFP Südwürttemberg, Neurologie Weissenau
- Sabolek M., Department of Neurology, Dietenbronn
- Schabet M., Department of Neurology, Ludwigsburg
- Schäff-Vogelsang M., Diakonie-Klinikum Schwäbisch Hall, Department of Neurology
- Schöls L., Universitätsklinikum Tübingen, Department of Neurology
- Schweigert B., Caritas Krankenhaus, Bad Mergentheim, Department of Neurology
- Sommer N., Christophsbad Göppingen, Department of Neurology
- Sperber W., Kliniken Esslingen, Department of Neurology
- Stroick M., Klinikum Memmingen, Department of Neurology
- Trottenberg T., Department of Neurology, Winnenden
- Weber F., Bundeswehrkrankenhaus Ulm, Department of Neurology
- Wessig C., University of Würzburg, Department of Neurology
- Will H.-G., Kliniken Schwenningen, Department of Neurology
- Winkler A., TU München, Department of Neurology

We highly appreciate the contribution of the following ALS registry study group:  
 The study nurses  
 I. Kraft-Oberbeck<sup>2</sup>  
 N. Lämmle<sup>2</sup>  
 K. Wirth<sup>1</sup>  
 and the excellent data managing of  
 Gaurav Berry<sup>1</sup>

### Author Contributions

Conceived and designed the experiments: AL GN. Performed the experiments: GN HU JK. Analyzed the data: GN HU JK. Wrote the paper: AL AR DR GN HU JK KG PW. Data collection: AL AR DR GN HU.

3. Logroscino G, Traynor BJ, Hardiman O, Chiò A, Mitchell D, et al. (2010) Incidence of amyotrophic lateral sclerosis in Europe. *J Neurol Neurosurg Psychiatr* 81: 385–390. doi:10.1136/jnnp.2009.183525.
4. Fang F, Valdimarsdóttir U, Bellocco R, Ronnevi L-O, Sparén P, et al. (2009) Amyotrophic lateral sclerosis in Sweden, 1991–2005. *Arch Neurol* 66: 515–519. doi:10.1001/archneurol.2009.13.
5. Neilson S, Robinson I, Alperovitch A (1994) Rising amyotrophic lateral sclerosis mortality in France 1968–1990: increased life expectancy and inter-disease competition as an explanation. *J Neurol* 241: 448–455.
6. Maasilta P, Jokelainen M, Löytönen M, Sabel CE, Gattrell AC (2001) Mortality from amyotrophic lateral sclerosis in Finland, 1986–1995. *Acta Neurol Scand* 104: 232–235.
7. Huisman MHB, de Jong SW, van Doormaal PTC, Weinreich SS, Schelhaas HJ, et al. (2011) Population based epidemiology of amyotrophic lateral sclerosis using capture-recapture methodology. *J Neurol Neurosurg Psychiatr* 82: 1165–1170. doi:10.1136/jnnp.2011.244939.
8. Piemonte and Valle d'Aosta Register for Amyotrophic Lateral Sclerosis (PARALS) (2001) Incidence of ALS in Italy: evidence for a uniform frequency in Western countries. *Neurology* 56: 239–244.
9. Logroscino G, Traynor BJ, Hardiman O, Chiò A, Couratier P, et al. (2008) Descriptive epidemiology of amyotrophic lateral sclerosis: new evidence and unsolved issues. *J Neurol Neurosurg Psychiatr* 79: 6–11. doi:10.1136/jnnp.2006.104828.
10. Blasco H, Guennoc A-M, Veyrat-Durebex C, Gordon PH, Andres CR, et al. (2012) Amyotrophic lateral sclerosis: a hormonal condition? *Amyotroph Lateral Scler* 13: 585–588. doi:10.3109/17482968.2012.706303.
11. Boumédiène F, Druet-Cabanac M, Marin B, Preux P-M, Allée P, et al. (2011) Contribution of geolocalisation to neuroepidemiological studies: incidence of ALS and environmental factors in Limousin, France. *J Neurol Sci* 309: 115–122. doi:10.1016/j.jns.2011.07.002.
12. Sabel CE, Boyle PJ, Löytönen M, Gattrell AC, Jokelainen M, et al. (2003) Spatial clustering of amyotrophic lateral sclerosis in Finland at place of birth and place of death. *Am J Epidemiol* 157: 898–905.
13. Scott KM, Abhinav K, Stanton BR, Johnston C, Turner MR, et al. (2009) Geographical clustering of amyotrophic lateral sclerosis in South-East England: a population study. *Neuroepidemiology* 32: 81–88. doi:10.1159/000177032.
14. Vázquez MC, Ketzoian C, Legnani C, Rega I, Sánchez N, et al. (2008) Incidence and prevalence of amyotrophic lateral sclerosis in Uruguay: a population-based study. *Neuroepidemiology* 30: 105–111. doi:10.1159/000120023.
15. Caller TA, Chipman JW, Field NC, Stommel EW (2013) Spatial analysis of amyotrophic lateral sclerosis in Northern New England, USA, 1997–2009. *Muscle & Nerve* 48: 235–241. doi:10.1002/mus.23761.
16. Wittie M, Nelson LM, Usher S, Ward K, Benatar M (2013) Utility of capture-recapture methodology to assess completeness of amyotrophic lateral sclerosis case ascertainment. *Neuroepidemiology* 40: 133–141. doi:10.1159/000342156.
17. Preux PM, Druet-Cabanac M, Couratier P, Debrock C, Truong T, et al. (2000) Estimation of the amyotrophic lateral sclerosis incidence by capture-recapture method in the Limousin region of France. *J Clin Epidemiol* 53: 1025–1029.
18. Nagel G, Uenal H, Rosenbohm A, Ludolph AC, Rothenbacher D, et al. (2013) Implementation of a population-based epidemiological rare disease registry: study protocol of the amyotrophic lateral sclerosis (ALS)-registry Swabia. *BMC Neurol* 13: 22. doi:10.1186/1471-2377-13-22.
19. Nagel G, Zoller D, Wiedmann T, Bussas U, El Idrissi-Lamghari C, et al. (2004) The use of the Epidemiology Cancer registry Baden-Württemberg in the follow-up of the EPIC cohort. *Gesundheitswesen* 66: 469–474. doi:10.1055/s-2004-813337.
20. Brooks BR (1994) El Escorial World Federation of Neurology criteria for the diagnosis of amyotrophic lateral sclerosis. Subcommittee on Motor Neuron Diseases/Amyotrophic Lateral Sclerosis of the World Federation of Neurology Research Group on Neuromuscular Diseases and the El Escorial “Clinical limits of amyotrophic lateral sclerosis” workshop contributors. *J Neurol Sci* 124 Suppl: 96–107.
21. Brooks BR (2000) Versailles minimal dataset for diagnosis of ALS: a distillate of the 2nd Consensus Conference on accelerating the diagnosis of ALS. Versailles 2nd Consensus Conference participants. *Amyotroph Lateral Scler Other Motor Neuron Disord* 1 Suppl 1: S79–81.
22. Brooks BR, Miller RG, Swash M, Munsat TL, World Federation of Neurology Research Group on Motor Neuron Diseases (2000) El Escorial revisited: revised criteria for the diagnosis of amyotrophic lateral sclerosis. *Amyotroph Lateral Scler Other Motor Neuron Disord* 1: 293–299.
23. Nagel G, Rosenbohm A, Ünal H, Rothenbacher D, Ludolph A, et al. (2012) Möglichkeiten register-basierter Studien zur Erforschung seltener Erkrankungen. *Aktuelle Neurologie* 39: 12–17. doi:10.1055/s-0031-1301340.
24. Federal statistical office, Germany (n.d.). eurostat. Available: <http://www.epp.eurostat.ec.europa.eu/>. Accessed 01 December 2013.
25. Federal health monitoring information system, Germany (n.d.). Standard\_populations. Available: [http://www.gbe-bund.de/glossary/Standard\\_populations.html](http://www.gbe-bund.de/glossary/Standard_populations.html). Accessed 2013 December 1.
26. Copyright, SAS Institute Inc. SAS and all other SAS institute Inc. product or service names are registered trademarks or trademarks of SAS institute Inc., Cary, NC, USA. (n.d.).
27. Kulldorff M (n.d.) Software and information management services. Inc. SaTScan TM v9.1.1 March 9 2011: Software for the spatial and space-time scan statistics. 2009. Available: <http://www.satscan.org>. Accessed 2013 December 1.
28. McCarty DJ, Tull ES, Moy CS, Kwok CK, LaPorte RE (1993) Ascertainment corrected rates: applications of capture-recapture methods. *Int J Epidemiol* 22: 559–565.
29. Chapman DG (1951) Some properties of the hypergeometric distribution with applications to zoological sample censuses. Berkeley: University of California Press.
30. Hook EB, Regal RR (1995) Capture-Recapture Methods in Epidemiology: Methods and Limitations. *Epidemiol Rev* 17: 243–264.
31. Schnabel ZE (1938) The Estimation of Total Fish Population of a Lake. *The American Mathematical Monthly* 45: 348–352. doi:10.2307/2304025.
32. Chapman DG, Washington Univ Seattle Lab of Statistical Research (1952) Inverse, multiple and Sequential sample censuses. Ft. Belvoir: Defense Technical Information Center. Available: <http://handle.dtic.mil/100.2/AD005527>. Accessed 2013 December 12.
33. Chao A, Tsay PK, Lin SH, Shau WY, Chao DY (2001) The applications of capture-recapture models to epidemiological data. *Stat Med* 20: 3123–3157.
34. Chao A, Yang H (n.d.) Program CARE-2 (for capture-recapture part. 2), 2003. Program and User's Guide published. Available: <http://chao.stat.nthu.edu.tw/softwareCE.html>. Accessed 2013 December 1.
35. Beghi E, Logroscino G, Chiò A, Hardiman O, Mitchell D, et al. (2006) The epidemiology of ALS and the role of population-based registries. *Biochim Biophys Acta* 1762: 1150–1157. doi:10.1016/j.bbadis.2006.09.008.
36. Wolfson C, Kilborn S, Oskoui M, Genge A (2009) Incidence and prevalence of amyotrophic lateral sclerosis in Canada: a systematic review of the literature. *Neuroepidemiology* 33: 79–88. doi:10.1159/000222089.
37. Pringle DG (1996) Mapping disease risk estimates based on small numbers: an assessment of empirical Bayes techniques. *Economic & Social Review*. Available: <http://www.tara.tcd.ie/handle/2262/64789>. Accessed 01 December 2013.
38. Rocchetti I, Taruscio D, Pierannunzio D (2012) Modeling delay to diagnosis for amyotrophic lateral sclerosis: under reporting and incidence estimates. *BMC Neurol* 12: 160. doi:10.1186/1471-2377-12-160.
39. Househam E, Swash M (2000) Diagnostic delay in amyotrophic lateral sclerosis: what scope for improvement? *J Neurol Sci* 180: 76–81.
40. Chiò A, Mora G, Calvo A, Mazzini L, Bottacchi E, et al. (2009) Epidemiology of ALS in Italy: a 10-year prospective population-based study. *Neurology* 72: 725–731. doi:10.1212/01.wnl.0000343008.26874.d1.
41. Forbes RB, Colville S, Parratt J, Swinger RJ (2007) The incidence of motor neuron disease in Scotland. *J Neurol* 254: 866–869. doi:10.1007/s00415-006-0454-y.
42. Annegers JF, Appel S, Lee JR, Perkins P (1991) Incidence and prevalence of amyotrophic lateral sclerosis in Harris County, Texas, 1985–1988. *Arch Neurol* 48: 589–593.
43. Gliklich RE, Dreyer NA, editors (2010) Registries for Evaluating Patient Outcomes: A User's Guide. 2nd ed. Rockville (MD): Agency for Healthcare Research and Quality (US). Available: <http://www.ncbi.nlm.nih.gov/books/NBK49444/>. Accessed 2013 December 1.
44. The European ALS consortium (EUR ALS)-exercise study. 2012. Available: <http://www.euromotorproject.eu/>. Accessed 2013 December 1.
